# Supplementary material for: Mandarin Variety Significantly Affects the Metabolites Present in the Leaves
Source: MDPI journal article supplement (doi:10.3390/horticulturae10040359), 2024-04-05

# $^1\text{H}$ -RMN SPECTRA AFOURER VARIETY

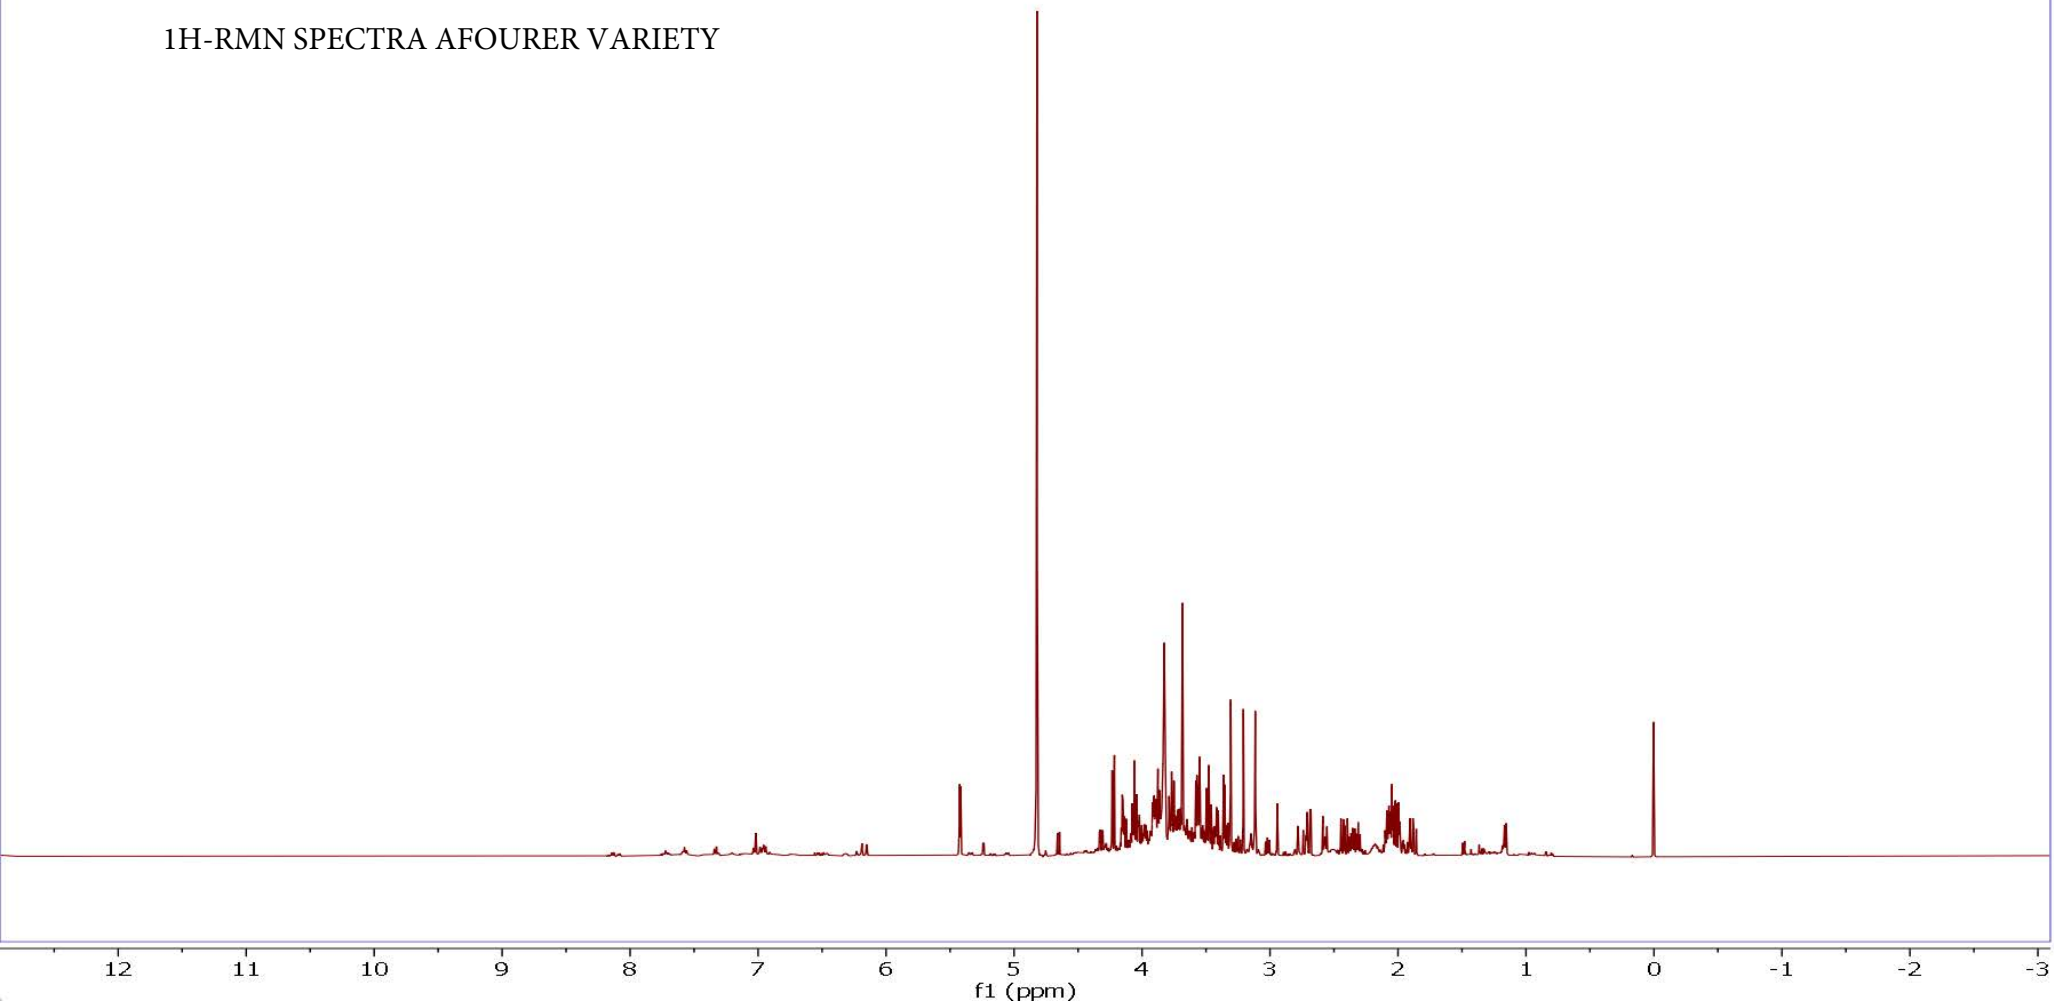

# <sup>1</sup>H-RMN SPECTRA ORRY VARIETY

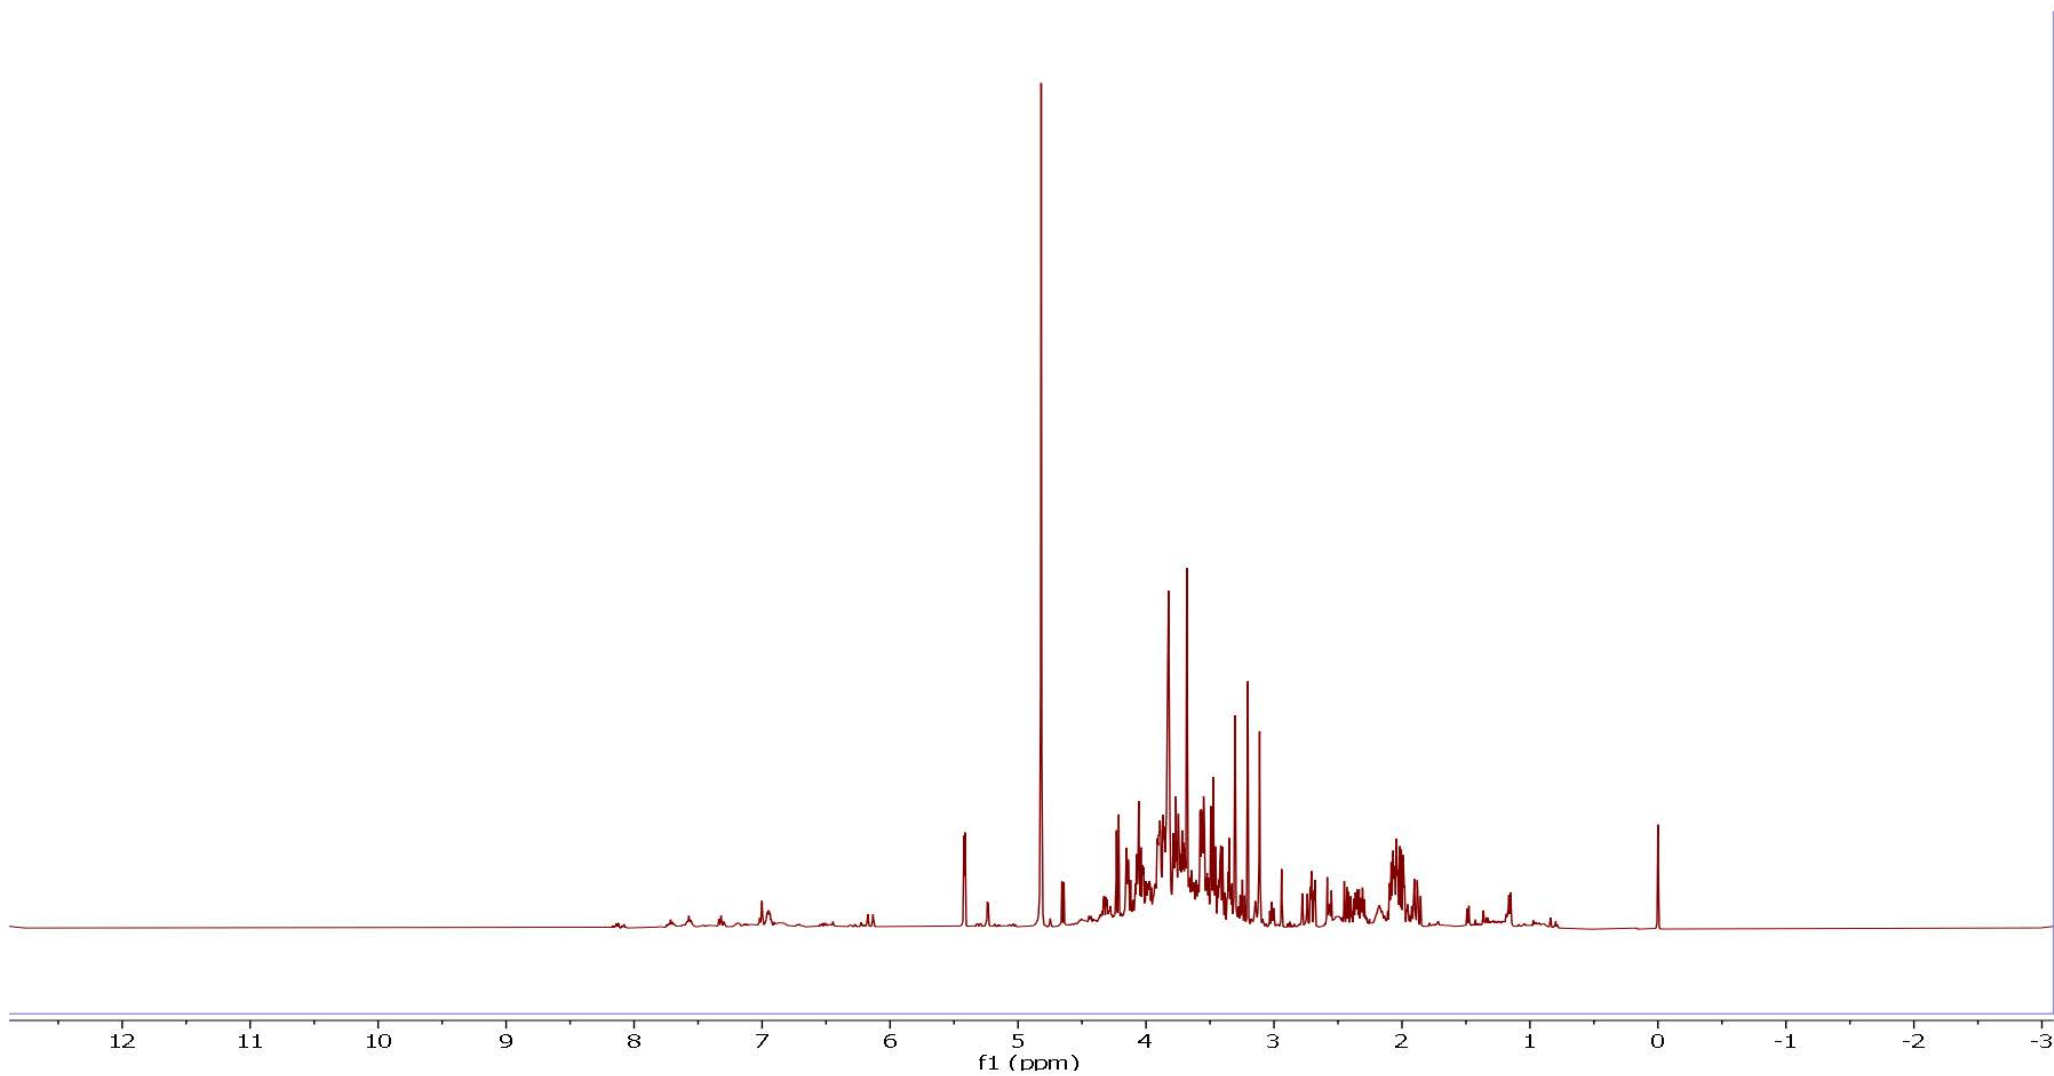

# $^1\text{H}$ -RMN SPECTRA TANGO VARIETY

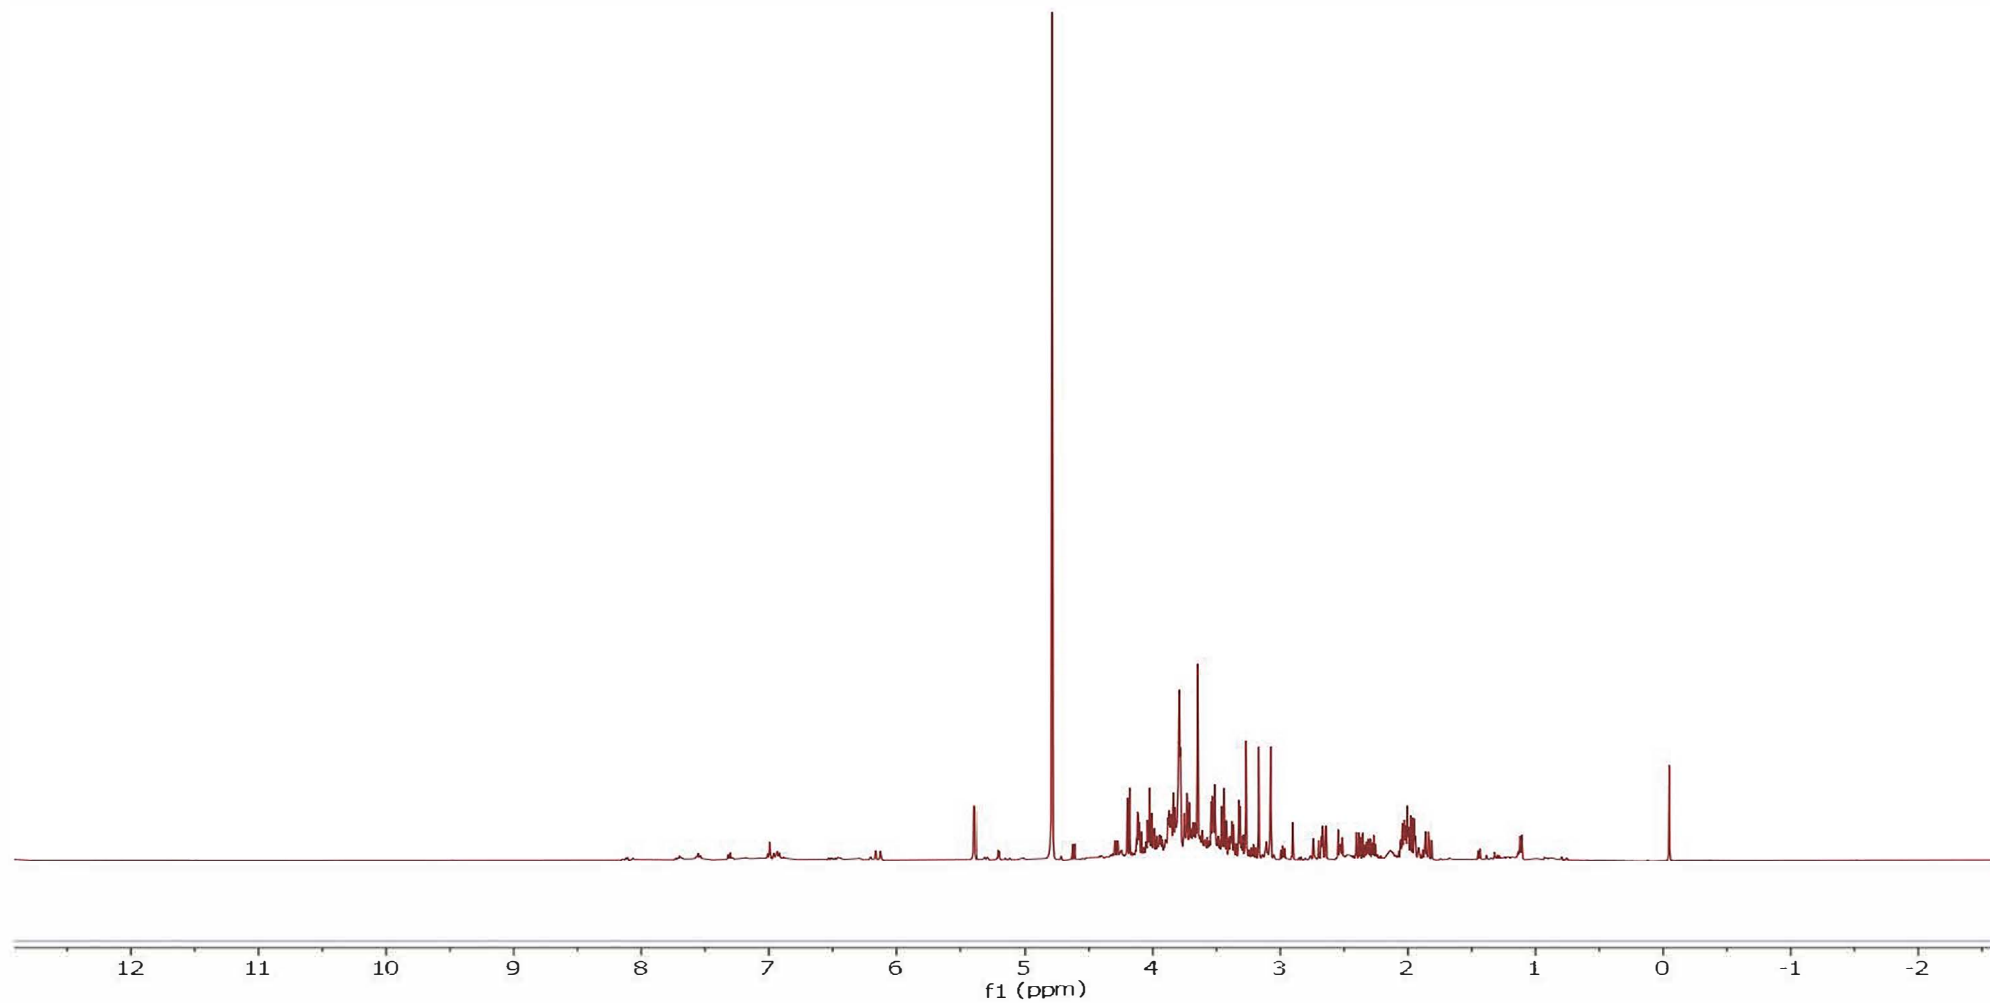

Supplement: s1 [file s1]
